# Supplementary material for: How Quickly Do Physicians Adopt New Drugs? The Case of Second-Generation Antipsychotics
Source: Atypon-hosted journal article supplement (doi:10.1176/appi.ps.201200186), 2013-01-02

Appendix: IMS Health Xponent™ database contains all prescriptions filled by a representative sample of 35,000 (73%) based in the United States, including independent pharmacies, chain pharmacies, pharmacies in discount outlets, pharmacy benefit management (PBM) firms. IMS Health then proportionately extrapolates their data on the basis of population to provide weekly estimates of all prescriptions filled in the U.S. The Xponent™ database does not track p

**Appendix: Kaplan Meier Survival Curves For Adjusted Time to Adoption for Olanzapine by Selected Physician Characteristics**

**Panel A: By Sex**

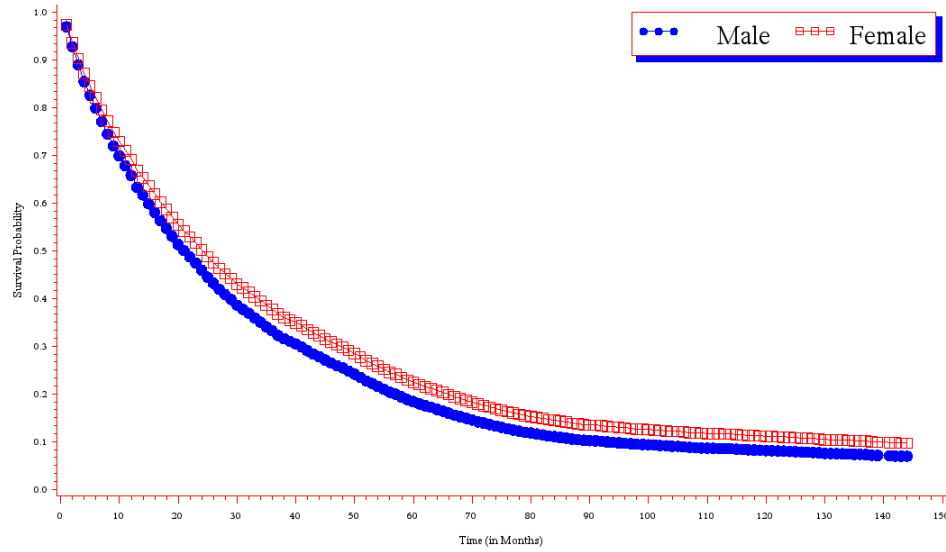

**Panel B: By Age Group**

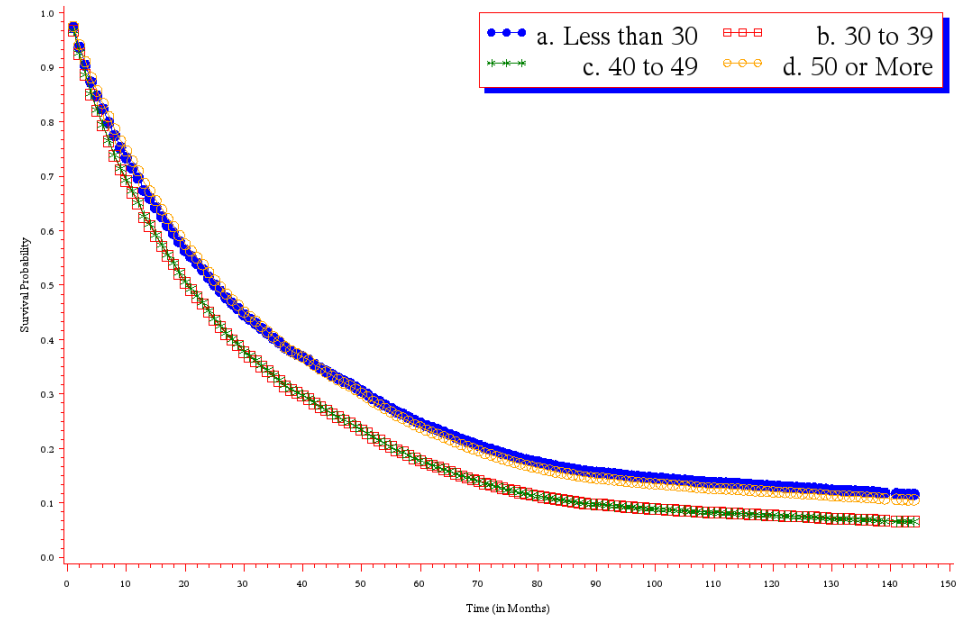

**Panel C: By Specialty**

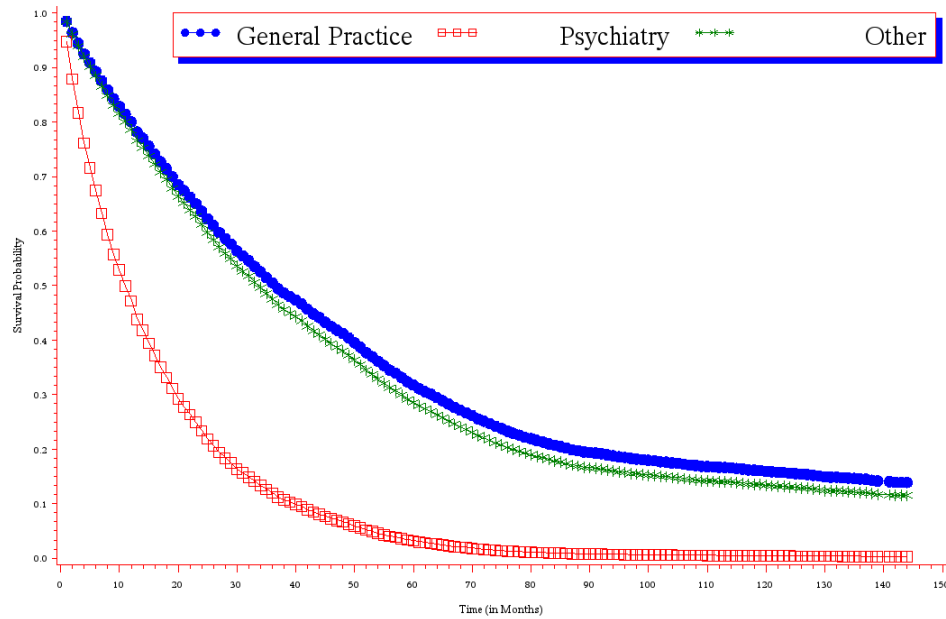

**Panel D: By Practice Type**

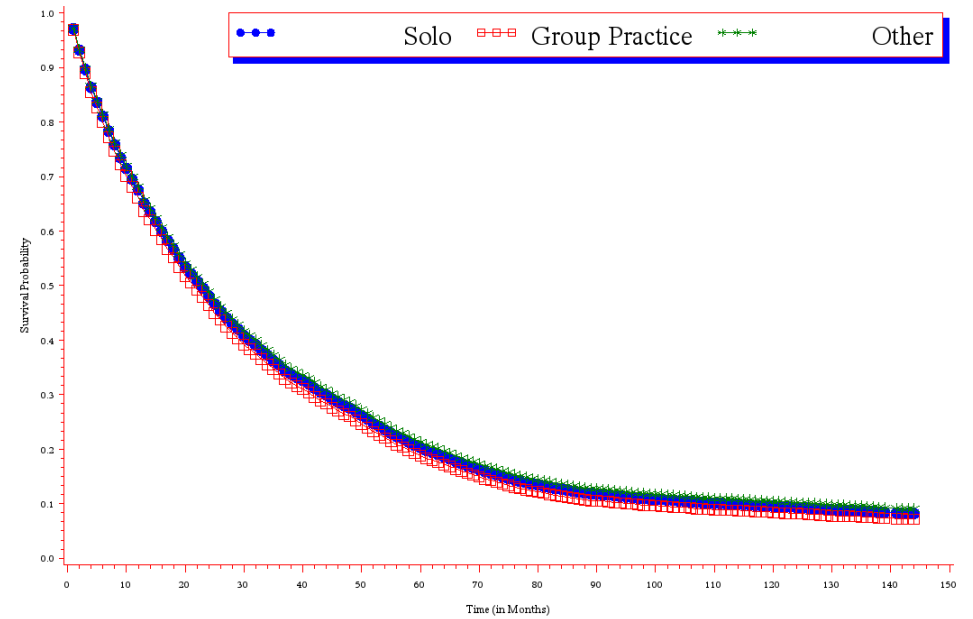

Panel F: By Foreign Medical Graduate

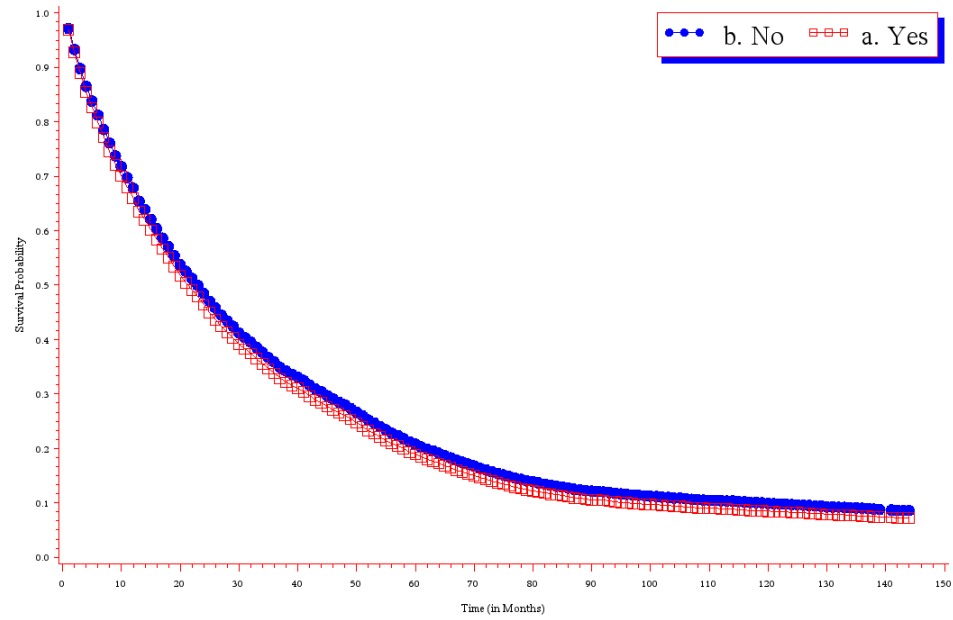

Panel E: By Top 25 Medical School

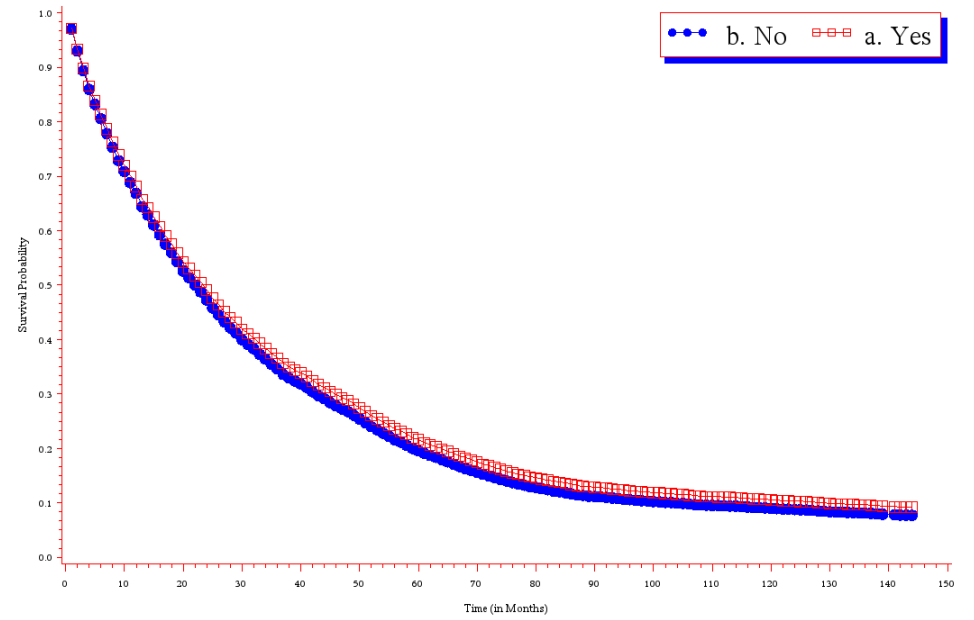

Panel G: By Volume Quartile

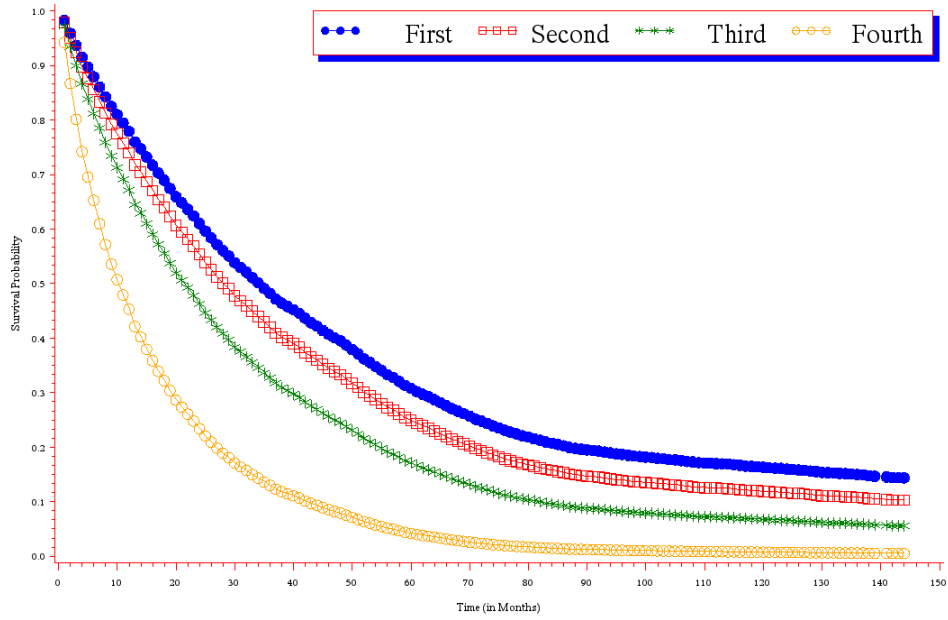

Supplement: 324_ds001.pdf [file 324_ds001.pdf]
